# Supplementary material for: Three-dimensional TiO2/CeO2 nanowire composite for efficient formaldehyde oxidation at low temperature
Source: Royal Society of Chemistry journal article supplement (doi:10.1039/c4ra13906b), 2014-12-10
Supplement: c4ra13906b1.pdf [file c4ra13906b1.pdf]

## Supporting Information

### Three-dimensional TiO<sub>2</sub>/CeO<sub>2</sub> Nanowire composite for Efficient Formaldehyde Oxidation at Low Temperature

Yongchao Huang, Haibo Li, Muhammad-Sadeeq Balogun, Hao Yang, Yexiang Tong, Xihong Lu,\* and Hongbing Ji\*

†Department of Chemical Engineering, MOE of the Key Laboratory of Bioinorganic and Synthetic Chemistry, School of Chemistry and Chemical Engineering, The Key Lab of Low-carbon Chemistry & Energy Conservation of Guangdong Province, Sun Yat-Sen University, Guangzhou 510275, People's Republic of China

E-mail: [luxh6@mail.sysu.edu.cn](mailto:luxh6@mail.sysu.edu.cn) (X. Lu); [jihb@mail.sysu.edu.cn](mailto:jihb@mail.sysu.edu.cn) (H. Ji)

#### **Experimental Section :**

**Preparation of TiO<sub>2</sub>/CeO<sub>2</sub> nanowires and Pt/TiO<sub>2</sub>/CeO<sub>2</sub> nanowires:** TiO<sub>2</sub> nanowires were grown on a carbon cloth substrate by a seed-assisted hydrothermal method reported elsewhere.<sup>1</sup> The TiO<sub>2</sub> nanowires were annealed in air at 550 °C for 1 h. TiO<sub>2</sub>/CeO<sub>2</sub> nanowires were obtained by depositing a CeO<sub>2</sub> nanowires onto the surface of TiO<sub>2</sub> nanowires by anodic electrodeposition. The electrodeposition was conducted in a solution (15 mL) containing cerous nitrate (0.01 M), ammonium chloride (0.1 M) and potassium chloride (0.03 M) at -2 mA for 60 min at 70 °C. CeO<sub>2</sub> nanowires were deposited on carbon cloth under the same conditions for comparison. The TiO<sub>2</sub>/CeO<sub>2</sub> nanowires and CeO<sub>2</sub> nanowires were annealed in air at 550 °C for 1 h. 0.35 g of TiO<sub>2</sub>/CeO<sub>2</sub> was added into an H<sub>2</sub>PtCl<sub>6</sub> solution under magnetic stirring. After impregnation for 1 h, 2.5 mL of the mixed solution of NaBH<sub>4</sub> solution (0.1 mol·L<sup>-1</sup>) and NaOH solution (0.5 mol·L<sup>-1</sup>) were quickly added into the suspension under vigorous stirring for 30 min. After reduction, the suspension was evaporated at 100 °C under stirring. Finally, the samples were dried at 80 °C for 6 h.

**Characterization:** The morphologies, chemical compositions, and the microstructures of the

products were characterized by field-emission scanning electron microscopy (FE-SEM, JSM-6330F), transmission electron microscopy (TEM, JEM2010-HR), and X-ray photoelectron spectroscopy (XPS, ESCALab250). The crystal phase of the NWs were characterized by XRD (Bruker, D8 ADVANCE) with Cu K $\alpha$  radiation ( $\lambda = 1.5418 \text{ \AA}$ ). The electrochemical properties of the products was investigated with cyclic voltammetry (CV) in a conventional three-electron cell employing a CHI 660D electrochemical workstation (Chenhua, Shanghai). The NWs on the carbon cloth substrates with a surface area of  $1.0 \text{ cm}^2$  were used as working electrodes. A Ag/AgCl electrode and a Pt wire were used as the reference and counter-electrode, respectively. Nitrogen adsorption/desorption isotherms at 77 K were conducted on an ASAP 2020 V3.03 H instrument. All samples (powders) were out gassed at  $100 \text{ }^\circ\text{C}$  for 5 h under flowing nitrogen before measurements.

Temperature-programmed reduction (TPR) analysis was conducted on a T-5080 Autochem analyzer. In a typical TPR experiment, about 0.1 g of the sample was loaded in a tube-shaped quartz cell above a small amount of quartz wool. The TPR profile of sample was recorded between  $35 \text{ }^\circ\text{C}$  and  $900 \text{ }^\circ\text{C}$  at a heating rate of  $10 \text{ }^\circ\text{C}\cdot\text{min}^{-1}$  in 10% hydrogen in  $\text{N}_2$  with a flow rate of  $50 \text{ mL}\cdot\text{min}^{-1}$ . Hydrogen uptake was monitored by TCD detector.

**Catalytic activity measurement:** Catalytic activities of as-prepared catalysts for HCHO oxidation were performed in a fixed-bed reactor under atmospheric pressure. The catalyst (200 mg) was loaded in a quartz tube reactor. Gaseous HCHO was generated by passing a purified air flow ( $\text{N}_2/\text{O}_2 = 4,100 \text{ mL}\cdot\text{min}^{-1}$ ) over HCHO solution in an incubator kept at  $0 \text{ }^\circ\text{C}$ , leading to a feed gas with 50 ppm of HCHO. The gas hourly space velocity (GHSV) is  $30,000 \text{ mL}\cdot\text{h}^{-1}\cdot\text{g}^{-1}$ . HCHO concentration in the reactant or product gas stream was analyzed by phenol spectrophotometric method. The gas stream containing trace HCHO was bubbled through 5 mL phenol reagent ( $\text{C}_6\text{H}_4\text{SN}(\text{CH}_3)\text{C}:\text{NNH}_2\cdot\text{HCl}$ ) solution ( $1\times 10^{-4}$  (wt.) %) for 30 seconds to collect HCHO by absorption. Then, 0.4 mL (1 wt.%) ammonium ferric sulfate ( $\text{NH}_4\text{Fe}(\text{SO}_4)_2\cdot 12\text{H}_2\text{O}$ ) solution was added as the coloring reagent. After shaking for 5 seconds and staying for 15 min in the dark, HCHO concentration in the gas stream was then determined by measuring light absorbance at 630 nm with a spectrophotometer (UV-240, Shimadzu Co. Ltd., Japan). The conversion of HCHO was calculated based on its concentration change.

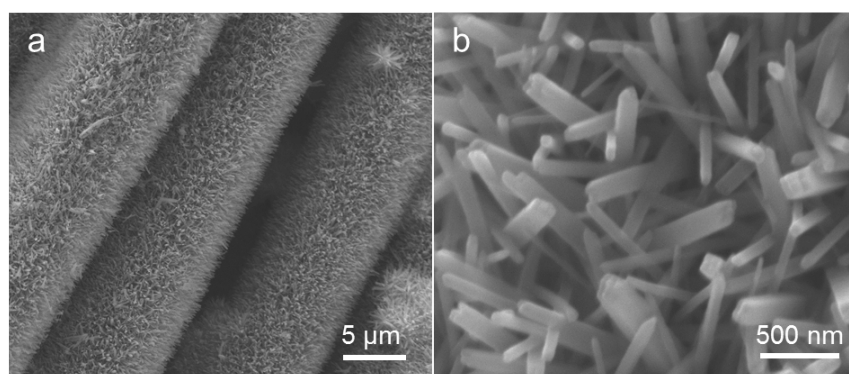

**Figure S1.** SEM images of the as-prepared TiO<sub>2</sub> nanowires on carbon cloth.

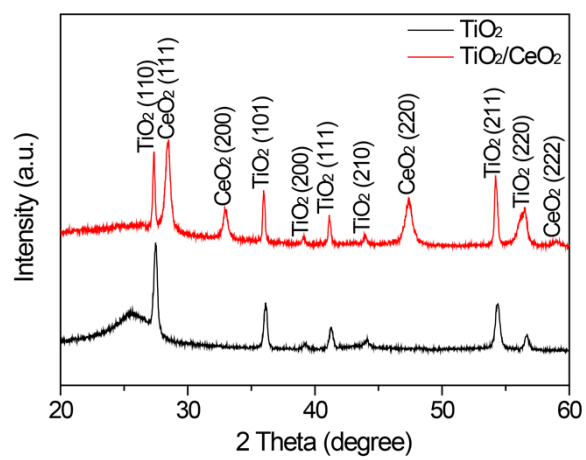

**Figure S2.** XRD pattern of TiO<sub>2</sub> nanowires and TiO<sub>2</sub>/CeO<sub>2</sub> nanowires.

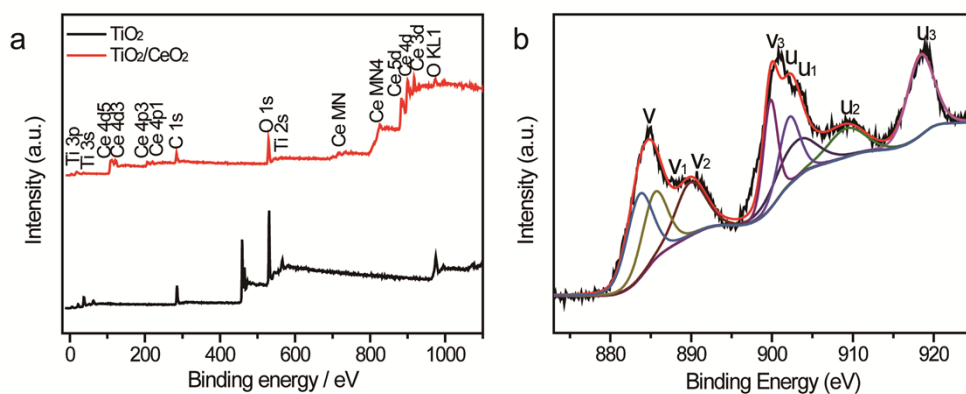

**Figure S3.** (a) XPS survey spectra of pure TiO<sub>2</sub> nanowires and TiO<sub>2</sub>/CeO<sub>2</sub> nanowires. (b) Ce 3d core-level XPS spectrum of TiO<sub>2</sub>/CeO<sub>2</sub> nanowires.

According to the XPS result, there are four elements (Ti, Ce, O, C) present on the surface of the final product (Figure S3a). The C signal is attributed to carbon fabric and adventitious carbon. Spectra of TiO<sub>2</sub>/CeO<sub>2</sub> nanowires confirm the presence of Ce, while no Ce signal is found for the TiO<sub>2</sub> nanowires. Eight peaks can be found in the Ce 3d spectrum of CeO<sub>2</sub> as shown in Figure S3b. The peaks labeled as u, u<sub>2</sub> and u<sub>3</sub> refer to Ce<sup>4+</sup> 3d<sub>3/2</sub>, and the peaks labeled as v, v<sub>2</sub> and v<sub>3</sub> refer to Ce<sup>4+</sup> 3d<sub>5/2</sub>. The characteristic peaks of Ce<sup>3+</sup> 3d<sub>3/2</sub> and 3d<sub>5/2</sub> states are labeled as u<sub>1</sub> and v<sub>1</sub>, respectively.<sup>2-3</sup> All these results reveal the successful fabrication of TiO<sub>2</sub>/CeO<sub>2</sub> nanowires composites.

- (1) Lu, X.; Yu, M.; Wang, G.; Zhai, T.; Xie, S.; Ling, Y.; Tong, Y.; Li, Y. *Adv. Mater.*, **2013**, 25, 267.
- (2) P. Burroughs, A. Hamnett, A.F. Orchard, G. Thornton, *J. Chem. Soc., Dalton Trans.* **1976**, 17, 1686.
- (3) A. Q. Wang, P. Panchaipetch, R. M. Wallace and T. D. Golden, *J. Vac. Sci. Technol., B* **2003**, 213, 1169.

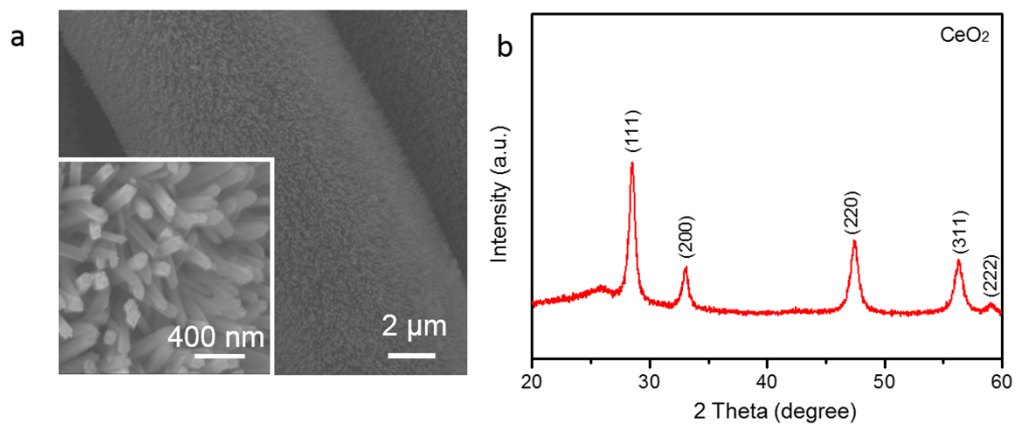

**Figure S4.** SEM images and XRD pattern of CeO<sub>2</sub> nanowires.

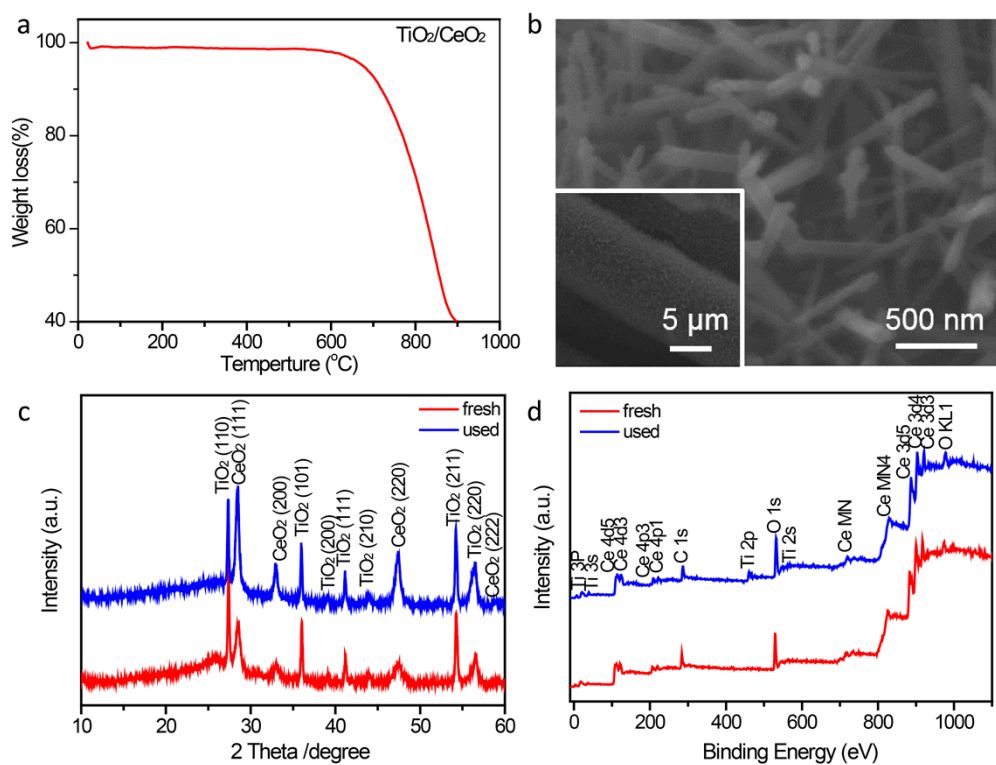

**Figure S5.** (a) TG pattern of TiO<sub>2</sub>/CeO<sub>2</sub> nanowires. (b) SEM images of TiO<sub>2</sub>/CeO<sub>2</sub> nanowires on a carbon cloth after the reaction. (c) XRD pattern of TiO<sub>2</sub>/CeO<sub>2</sub> nanowires before and after the reaction. (d) XPS patterns of TiO<sub>2</sub>/CeO<sub>2</sub> nanowires before and after the reaction.

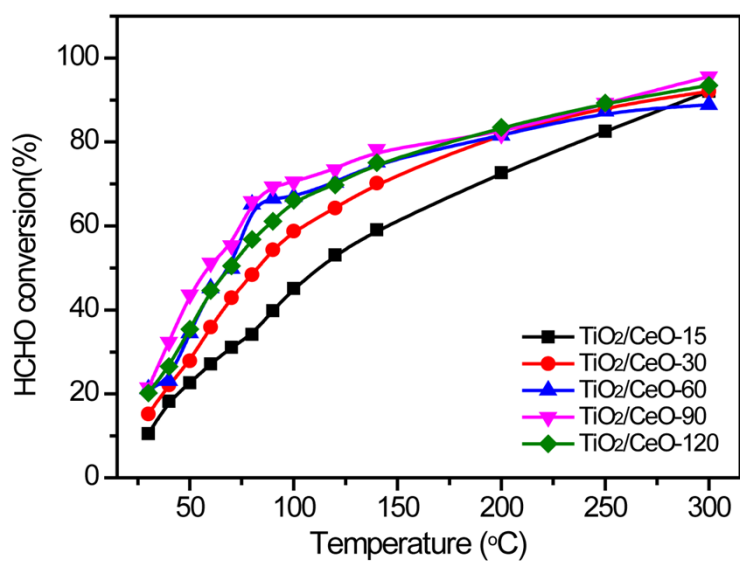

**Figure S6.** Catalytic performance of HCHO of the TiO<sub>2</sub>/CeO<sub>2</sub> at different CeO<sub>2</sub> electrodeposition time variation.

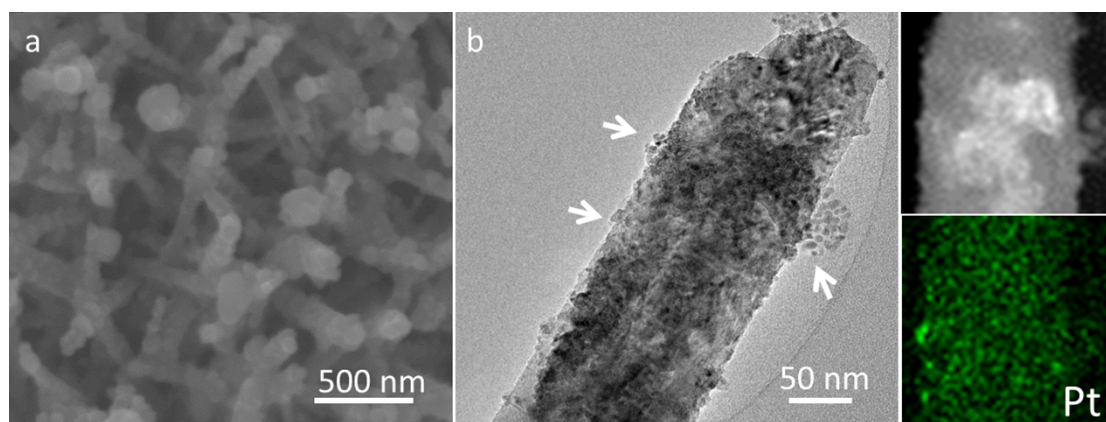

**Figure S7.** (a) SEM images of Pt/TiO<sub>2</sub>/CeO<sub>2</sub> nanowires on a carbon cloth. (b) TEM image of Pt/TiO<sub>2</sub>/CeO<sub>2</sub> nanowires and elemental mapping of the Pt element present in Pt/TiO<sub>2</sub>/CeO<sub>2</sub> nanowires.
